# Supplementary material for: Recognition of Dimeric Lewis X by Anti-Dimeric Lex Antibody SH2
Source: MDPI journal article supplement (doi:10.3390/vaccines8030538), 2020-09-17

Titration curves for SH2 ascites with various coating concentrations of conjugate (DimLe<sup>x</sup>)<sub>16</sub>-BSA **1**

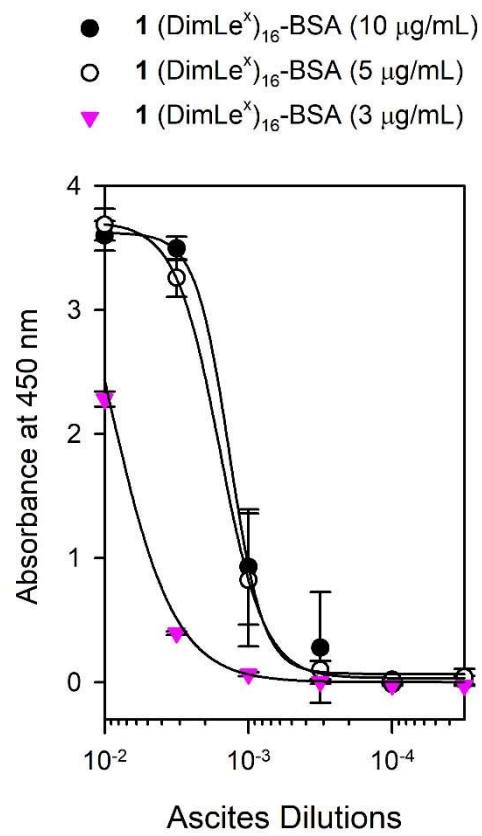

Supplement: s1 [file s1]
